# Supplementary material
Source: Springer Nature journal article supplement (https://www.springermedizin.de/resource/supplementary/13058_2005_1340_MOESM6_ESM.pdf/9698894)

# Bcl-2 EXPRESSION

A

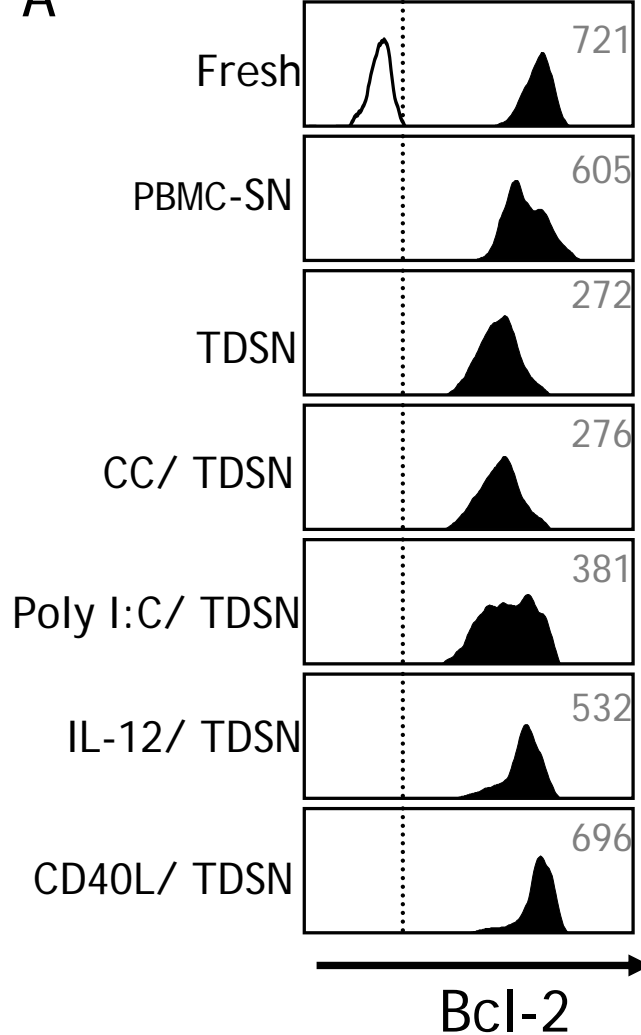

B

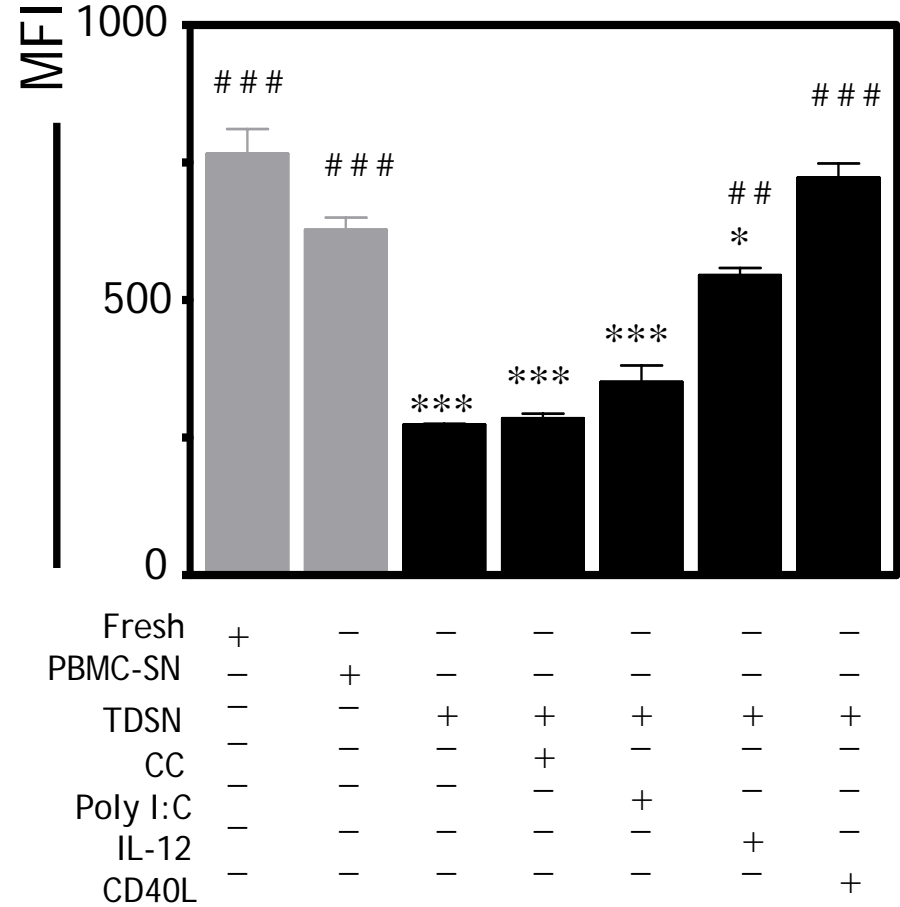

|          |   |   |   |   |   |   |   |
|----------|---|---|---|---|---|---|---|
| Fresh    | + | - | - | - | - | - | - |
| PBMC-SN  | - | + | - | - | - | - | - |
| TDSN     | - | - | + | + | + | + | + |
| CC       | - | - | - | + | - | - | - |
| Poly I:C | - | - | - | - | + | - | - |
| IL-12    | - | - | - | - | - | + | - |
| CD40L    | - | - | - | - | - | - | + |

Supplement: MOESM6 [file 9698894]
